# Supplementary material
Source: Elsevier journal article supplement (https://www.sciencedirect.com/science/article/pii/S0300893219303306)
Supplement: mmc1 [file S0300893219303306:mmc1.pdf]

## MATERIAL ADICIONAL

### MÉTODOS

#### Mediciones antropométricas

Se midió la altura en cm utilizando un estadiómetro portátil Seca modelo 213 (rango 0-200 cm; precisión, 0,1 cm), (Seca GmbH & Co. Kg., Hamburg, Alemania). El peso corporal se midió utilizando básculas digitales calibradas Seca modelo 803, rango 0,1-150 kg; precisión, 0,1 kg (Seca GmbH & Co. Kg., Hamburg, Alemania). La circunferencia de la cintura (CC) se midió en el punto medio entre el último reborde costal y la cresta iliaca; el perímetro de la cadera se midió en el punto de máxima circunferencia sobre las nalgas en un plano horizontal. Ambos perímetros se midieron por triplicado con una cinta métrica inextensible modelo Seca 201 (Seca GmbH & Co. Kg., Hamburg, Alemania) (rango 0-150 cm; precisión, 0,1 cm).

#### Criterios utilizados para definir el sobrepeso y la obesidad

Siguiendo las recomendaciones del *European Childhood Obesity Group* (ECOG)<sup>1</sup>, se ha tipificado la sobrecarga ponderal a partir del valor del índice de masa corporal (IMC) utilizando los criterios propuestos por la Organización Mundial de la Salud (OMS) para menores de 5 años<sup>2</sup> y a partir de 5 años<sup>3</sup> y los propuestos por la *International Obesity Task Force* (IOTF)<sup>4,5</sup> con fines de comparación internacional, considerando, además, los criterios de la Fundación Orbegozo 2011<sup>6</sup>. La edad, en meses, se calculó con la fecha de nacimiento y la fecha de exploración. En este material se describe de forma más detallada los procedimientos.

Se consideraron puntos de corte específicos para la edad (en meses) y sexo para el IMC, de acuerdo al valor del percentil correspondiente a un IMC igual a 25 a los 18 años de edad (sobrepeso), o igual a 30 para la obesidad en el caso de los criterios IOTF<sup>5</sup>. Se calcularon los z-score del IMC utilizando los parámetros LMS [L (asimetría) M (mediana) S (coeficiente de variación)] propuestos por Cole y Lobstein<sup>5</sup>, de acuerdo a la fórmula  $[IMC_z = ((IMC/M)^L - 1)/L \times S]$ , donde los valores para L, M y S son los correspondientes a la edad y sexo del sujeto.

Se definió el sobrepeso para valores de z-score del IMC 1.310 (percentil 90) en chicos y 1.244 (percentil 88) para las chicas. La obesidad se ha definido para valores de z-score del IMC 2.288 (percentil 99) en chicos y 2.192 (percentil 99) para chicas, respectivamente. Además, de acuerdo a los criterios de la OMS, el sobrepeso se ha definido para valores de z-score  $\geq 2$  desviación estándar y la obesidad para z-score  $\geq 3$  desviación estándar en los menores de 5 años de edad<sup>7</sup>, y para valores de z-score  $\geq 1$  desviación estándar y la obesidad para z-score  $\geq 2$  desviación estándar en los de 5 y más años. Los z-score del IMC en este caso se calcularon con la misma fórmula, pero con los parámetros LMS propuestos por la OMS específicos para la edad y el sexo.

También se han utilizado los criterios empleados en el estudio *enKid*, las tablas de la Fundación Faustino Orbegozo publicadas en 1988<sup>8</sup>, (percentil 85 para definir el sobrepeso y percentil 97 para definir la obesidad), así como según las versiones posteriores publicadas en 2004<sup>9</sup> (percentiles 85 y 97 para sobrepeso y obesidad, respectivamente) y en 2011<sup>6</sup> (en esta edición proponen puntos de corte establecidos según método LMS de Cole et al.<sup>5</sup>).

## BIBLIOGRAFÍA

1. Rolland-Cachera MF. Childhood obesity: current definitions and recommendations for their use. *Int J Pediatr Obes*. 2011;6:325-331.
2. WHO Multicentre Growth Reference Study Group. WHO Child Growth Standards based on length/height, weight and age. *Acta Paediatr Suppl*. 2006;450:76-85.
3. de Onis M, Onyango AW, Borghi E, Siyam A, Nishida C, Siekmann J. Development of a WHO growth reference for school-aged children and adolescents. *Bull World Health Organ*. 2007;85:660-667.
4. Cole TJ, Bellizzi MC, Flegal KM, Dietz WH. Establishing a standard definition for child overweight and obesity worldwide: international survey. *Br Med J*. 2000;320:1240-1243.
5. Cole TJ, Lobstein T. Extended international (IOTF) body mass index cut-offs for thinness, overweight and obesity. *Pediatr Obes*. 2012;7:284-294.

6. Fernández C, Lorenzo H, Vrotsou K, Aresti U, Rica I; Sánchez E. Estudio de Crecimiento de Bilbao. Curvas y Tablas de Crecimiento (Estudio Transversal). Bilbao, Spain: Fundación Faustino Orbegozo Eizaguirre; 2011: p 1-38. Disponible en: [https://www.fundacionorbegozo.com/wp-content/uploads/pdf/estudios\\_2011.pdf](https://www.fundacionorbegozo.com/wp-content/uploads/pdf/estudios_2011.pdf). Consultado 3 Jul 2019.
7. de Onis M, Blossner M, Borghi E. Global prevalence and trends of overweight and obesity among preschool children. *Am J Clin Nutr*. 2010;92:1257–1264.
8. Hernández M, Castellet J, Narvaiza JL, et al. Curvas y tablas de crecimiento. Instituto sobre Crecimiento y Desarrollo. Fundación F. Orbegozo. Madrid: Editorial Garsi; 1988: pp 1-33. Disponible en: [https://www.fundacionorbegozo.com/wp-content/uploads/pdf/estudios\\_1988.pdf](https://www.fundacionorbegozo.com/wp-content/uploads/pdf/estudios_1988.pdf). Consultado 3 Jul 2019).
9. Sobradillo B, Aguirre A, Aresti U, Bilbao A, Fernández-Ramos C, Lizarraga A, et al., Curvas y Tablas de Crecimiento (Estudios Longitudinal y Transversal). Bilbao, Spain: Fundación Faustino Orbegozo Eizaguirre, 2004: pp 1-36. Disponible en: [https://www.fundacionorbegozo.com/wp-content/uploads/pdf/estudios\\_2004.pdf](https://www.fundacionorbegozo.com/wp-content/uploads/pdf/estudios_2004.pdf). Consultado 3 Jul 2019.
